# Supplementary material for: Zinc Finger E-Box Binding Homeobox 2 as a Prognostic Biomarker in Various Cancers and Its Correlation with Infiltrating Immune Cells in Ovarian Cancer
Source: MDPI journal article supplement (doi:10.3390/cimb44030079), 2022-03-01
Supplement: s1 [file s1]

## Supplementary Materials:

Supplementary Table S1. Survival analysis of ZEB2 in various cancers using prognoscan database.

| DATASET        | CANCER TYPE       | ENDPOINT                         | N   | ln(HR-high / HR-low) | p-VALUE           | ln(HR)    | HR [95% CI-low CI-up] |
|----------------|-------------------|----------------------------------|-----|----------------------|-------------------|-----------|-----------------------|
| GSE16131-GPL97 | Blood cancer      | Overall Survival                 | 180 | 0.806407             | <b>0.0470009</b>  | 0.446249  | 1.56 [1.01 - 2.43]    |
| GSE4412-GPL96  | Brain cancer      | Overall Survival                 | 74  | -1.2724              | <b>0.0404328</b>  | -0.634978 | 0.53 [0.29 - 0.97]    |
| GSE16581       | Brain cancer      | Overall Survival                 | 67  | 1.80158              | <b>0.0376143</b>  | 2.76856   | 15.94 [1.17 - 216.72] |
| GSE19615       | Breast cancer     | Distant Metastasis Free Survival | 115 | -1.77523             | <b>0.0293108</b>  | -1.0131   | 0.36 [0.15 - 0.90]    |
| GSE12276       | Breast cancer     | Relapse Free Survival            | 204 | -0.563349            | <b>0.0328363</b>  | -0.272153 | 0.76 [0.59 - 0.98]    |
| GSE1456-GPL96  | Breast cancer     | Disease Specific Survival        | 159 | -1.30938             | <b>0.0458268</b>  | -0.633631 | 0.53 [0.28 - 0.99]    |
| GSE3494-GPL96  | Breast cancer     | Disease Specific Survival        | 236 | -1.07136             | <b>0.0377182</b>  | -0.533531 | 0.59 [0.35 - 0.97]    |
| GSE4922-GPL96  | Breast cancer     | Disease Free Survival            | 249 | -1.00845             | <b>0.0201433</b>  | -0.464822 | 0.63 [0.42 - 0.93]    |
| GSE4922-GPL97  | Breast cancer     | Disease Free Survival            | 249 | -0.742581            | <b>0.0238131</b>  | -0.516104 | 0.60 [0.38 - 0.93]    |
| GSE17536       | Colorectal cancer | Disease Free Survival            | 145 | 1.24824              | <b>0.038437</b>   | 0.898199  | 2.46 [1.05 - 5.75]    |
| GSE17536       | Colorectal cancer | Disease Free Survival            | 145 | 2.08083              | <b>0.0032525</b>  | 0.60329   | 1.83 [1.22 - 2.73]    |
| GSE17536       | Colorectal cancer | Disease Specific Survival        | 177 | 0.840664             | <b>0.00405702</b> | 0.463378  | 1.59 [1.16 - 2.18]    |
| GSE17536       | Colorectal cancer | Disease Specific Survival        | 177 | -1.26034             | <b>0.0373419</b>  | -2.16037  | 0.12 [0.02 - 0.88]    |
| GSE17536       | Colorectal cancer | Disease Specific Survival        | 177 | 0.953897             | <b>0.0241088</b>  | 0.785333  | 2.19 [1.11 - 4.34]    |
| GSE17536       | Colorectal cancer | Overall Survival                 | 177 | -1.13161             | <b>0.0179672</b>  | -2.11959  | 0.12 [0.02 - 0.69]    |
| GSE17536       | Colorectal cancer | Overall Survival                 | 177 | 0.764409             | <b>0.0177957</b>  | 0.325741  | 1.39 [1.06 - 1.81]    |
| GSE14333       | Colorectal cancer | Disease Free Survival            | 226 | 1.02136              | <b>0.0261089</b>  | 0.251215  | 1.29 [1.03 - 1.60]    |
| GSE14333       | Colorectal cancer | Disease Free Survival            | 226 | 0.969175             | <b>0.0195668</b>  | 0.310015  | 1.36 [1.05 - 1.77]    |
| GSE14333       | Colorectal cancer | Disease Free Survival            | 226 | 1.1729               | <b>0.00513886</b> | 0.506459  | 1.66 [1.16 - 2.37]    |
| GSE31210       | Lung cancer       | Relapse Free Survival            | 204 | -0.845839            | <b>0.00169391</b> | -0.956522 | 0.38 [0.21 - 0.70]    |
| GSE9891        | Ovarian cancer    | Overall Survival                 | 278 | -0.809959            | <b>0.0447499</b>  | -1.12764  | 0.32 [0.11 - 0.97]    |

Bold values indicate  $P < 0.05$

Supplementary Table S2. Correlation between ZEB2 and infiltrating immune cells in different types of cancer using  
TIMER database.

| Cancer type                                                      | T-cell CD4+ |              | T-cell CD8+ |              | B Cell |              | Neutrophil |              | Macrophage |              | Dendritic cell |              |
|------------------------------------------------------------------|-------------|--------------|-------------|--------------|--------|--------------|------------|--------------|------------|--------------|----------------|--------------|
|                                                                  | R           | P            | R           | P            | R      | P            | R          | P            | R          | P            | R              | P            |
| Adrenocortical carcinoma                                         | -0.06       | 0.616        | 0.18        | 0.132        | 0.21   | 0.068        | 0.15       | 0.208        | 0.27       | <b>0.020</b> | 0.07           | 0.580        |
| Bladder Urothelial Carcinoma                                     | 0.17        | <b>0.001</b> | 0.25        | <b>0.000</b> | -0.18  | <b>0.000</b> | 0.37       | <b>0.000</b> | 0.39       | <b>0.000</b> | 0.30           | <b>0.000</b> |
| Breast invasive carcinoma                                        | 0.04        | 0.268        | 0.34        | <b>0.000</b> | -0.17  | <b>0.000</b> | 0.58       | <b>0.000</b> | 0.50       | <b>0.000</b> | 0.42           | <b>0.000</b> |
| Cervical squamous cell carcinoma and endocervical adenocarcinoma | 0.21        | <b>0.000</b> | 0.29        | <b>0.000</b> | 0.09   | 0.134        | 0.36       | <b>0.000</b> | 0.20       | <b>0.001</b> | 0.44           | <b>0.000</b> |
| Cholangiocarcinoma                                               | 0.15        | 0.396        | 0.48        | <b>0.003</b> | 0.47   | <b>0.005</b> | 0.21       | 0.232        | 0.41       | <b>0.014</b> | 0.60           | <b>0.000</b> |
| Colon adenocarcinoma                                             | 0.43        | <b>0.000</b> | 0.32        | <b>0.000</b> | -0.19  | <b>0.002</b> | 0.70       | <b>0.000</b> | 0.61       | <b>0.000</b> | 0.80           | <b>0.000</b> |
| Lymphoid Neoplasm Diffuse Large B-cell Lymphoma                  | -0.12       | 0.472        | 0.51        | <b>0.001</b> | -0.03  | 0.867        | 0.82       | <b>0.000</b> | -0.16      | 0.329        | 0.32           | <b>0.038</b> |
| Esophageal carcinoma                                             | 0.23        | 0.002        | 0.36        | <b>0.000</b> | 0.15   | <b>0.048</b> | 0.38       | <b>0.000</b> | 0.65       | <b>0.000</b> | 0.53           | <b>0.000</b> |
| Glioblastoma multiforme                                          | 0.06        | 0.484        | -0.16       | 0.069        | 0.30   | <b>0.000</b> | 0.03       | 0.689        | 0.10       | 0.260        | 0.23           | <b>0.006</b> |
| Head and Neck squamous cell carcinoma                            | 0.38        | <b>0.000</b> | -0.25       | <b>0.000</b> | -0.34  | <b>0.000</b> | 0.49       | <b>0.000</b> | 0.57       | <b>0.000</b> | 0.25           | <b>0.000</b> |
| Kidney Chromophobe                                               | 0.06        | 0.657        | 0.41        | <b>0.001</b> | 0.48   | <b>0.000</b> | 0.36       | <b>0.003</b> | 0.58       | <b>0.000</b> | 0.64           | <b>0.000</b> |
| Kidney renal clear cell carcinoma                                | 0.42        | <b>0.000</b> | 0.09        | <b>0.044</b> | -0.26  | <b>0.000</b> | 0.62       | <b>0.000</b> | 0.50       | <b>0.000</b> | 0.25           | <b>0.000</b> |
| Kidney renal papillary cell carcinoma                            | 0.15        | <b>0.019</b> | 0.30        | <b>0.000</b> | 0.30   | <b>0.000</b> | 0.44       | <b>0.000</b> | 0.41       | <b>0.000</b> | 0.44           | <b>0.000</b> |
| Brain Lower Grade Glioma                                         | -0.10       | <b>0.031</b> | 0.11        | 0.014        | 0.22   | <b>0.000</b> | 0.10       | <b>0.036</b> | -0.04      | 0.422        | -0.09          | <b>0.038</b> |
| Liver hepatocellular carcinoma                                   | 0.30        | <b>0.000</b> | 0.43        | <b>0.000</b> | 0.30   | <b>0.000</b> | 0.38       | <b>0.000</b> | 0.55       | <b>0.000</b> | 0.61           | <b>0.000</b> |
| Lung adenocarcinoma                                              | 0.18        | <b>0.000</b> | 0.39        | <b>0.000</b> | -0.04  | 0.403        | 0.62       | <b>0.000</b> | 0.53       | <b>0.000</b> | 0.45           | <b>0.000</b> |
| Lung squamous cell carcinoma                                     | 0.20        | <b>0.000</b> | 0.37        | <b>0.000</b> | 0.05   | 0.326        | 0.40       | <b>0.000</b> | 0.26       | <b>0.000</b> | 0.58           | <b>0.000</b> |
| Mesothelioma                                                     | 0.04        | 0.714        | 0.31        | <b>0.003</b> | 0.10   | 0.355        | 0.30       | <b>0.006</b> | 0.57       | <b>0.000</b> | 0.50           | <b>0.000</b> |
| Ovarian serous cystadenocarcinoma                                | 0.11        | 0.095        | 0.24        | <b>0.000</b> | -0.19  | <b>0.002</b> | 0.58       | <b>0.000</b> | 0.48       | <b>0.000</b> | 0.23           | <b>0.000</b> |
| Pancreatic adenocarcinoma                                        | 0.08        | 0.286        | 0.72        | <b>0.000</b> | 0.06   | 0.447        | 0.72       | <b>0.000</b> | 0.68       | <b>0.000</b> | 0.78           | <b>0.000</b> |
| Pheochromocytoma and Paraganglioma                               | 0.26        | <b>0.001</b> | 0.25        | <b>0.001</b> | 0.01   | 0.929        | 0.34       | <b>0.000</b> | 0.29       | <b>0.000</b> | 0.48           | <b>0.000</b> |
| Prostate adenocarcinoma                                          | 0.52        | <b>0.000</b> | 0.18        | <b>0.000</b> | -0.02  | 0.629        | 0.61       | <b>0.000</b> | 0.33       | <b>0.000</b> | 0.67           | <b>0.000</b> |
| Rectum adenocarcinoma                                            | 0.46        | <b>0.000</b> | 0.36        | <b>0.000</b> | 0.12   | 0.265        | 0.56       | <b>0.000</b> | 0.57       | <b>0.000</b> | 0.80           | <b>0.000</b> |
| Sarcoma                                                          | 0.24        | <b>0.000</b> | 0.03        | 0.690        | -0.05  | 0.432        | 0.41       | <b>0.000</b> | 0.28       | <b>0.000</b> | 0.13           | <b>0.042</b> |
| Skin Cutaneous Melanoma                                          | 0.15        | <b>0.001</b> | 0.09        | 0.056        | -0.04  | 0.452        | 0.49       | <b>0.000</b> | 0.09       | 0.051        | 0.04           | 0.449        |
| Stomach adenocarcinoma                                           | 0.40        | <b>0.000</b> | 0.62        | <b>0.000</b> | 0.13   | <b>0.012</b> | 0.60       | <b>0.000</b> | 0.73       | <b>0.000</b> | 0.62           | <b>0.000</b> |
| Testicular Germ Cell Tumors                                      | 0.45        | <b>0.000</b> | -0.08       | 0.341        | -0.38  | <b>0.000</b> | 0.47       | <b>0.000</b> | 0.17       | <b>0.037</b> | 0.38           | <b>0.000</b> |
| Thyroid carcinoma                                                | 0.48        | <b>0.000</b> | -0.26       | <b>0.000</b> | -0.18  | <b>0.000</b> | 0.39       | <b>0.000</b> | 0.27       | <b>0.000</b> | 0.24           | <b>0.000</b> |
| Thymoma                                                          | -0.23       | <b>0.012</b> | -0.46       | <b>0.000</b> | -0.13  | 0.161        | 0.25       | <b>0.007</b> | 0.27       | <b>0.004</b> | -0.25          | <b>0.008</b> |
| Uterine Corpus Endometrial Carcinoma                             | 0.37        | <b>0.000</b> | 0.20        | 0.063        | 0.34   | <b>0.001</b> | 0.48       | <b>0.000</b> | 0.51       | <b>0.000</b> | 0.27           | <b>0.012</b> |
| Uterine Carcinosarcoma                                           | -0.25       | 0.066        | 0.39        | <b>0.004</b> | -0.01  | 0.961        | -0.34      | <b>0.012</b> | 0.14       | 0.327        | 0.15           | 0.288        |
| Uveal Melanoma                                                   | -0.10       | 0.379        | 0.11        | 0.335        | -0.29  | <b>0.010</b> | 0.28       | <b>0.015</b> | 0.08       | 0.470        | -0.02          | 0.891        |

Bold values indicate  $P < 0.05$

Supplementary Table S3. Correlations with ZEB2-related proteins in various types of cancer using STRING

network database.

| Cancer type                                                      | SMAD1 |              | SMAD2 |              | SMAD3 |              | SMAD5 |              | CTBP1 |              | CTBP2 |              |
|------------------------------------------------------------------|-------|--------------|-------|--------------|-------|--------------|-------|--------------|-------|--------------|-------|--------------|
|                                                                  | R     | P            | R     | P            | R     | P            | R     | P            | R     | P            | R     | P            |
| Adrenocortical carcinoma                                         | 0.51  | <b>0.000</b> | 0.46  | <b>0.000</b> | 0.41  | <b>0.000</b> | 0.44  | <b>0.000</b> | 0.18  | 0.120        | 0.38  | <b>0.001</b> |
| Bladder Urothelial Carcinoma                                     | 0.31  | <b>0.000</b> | 0.04  | 0.378        | -0.23 | <b>0.000</b> | -0.03 | 0.558        | -0.10 | 0.053        | 0.13  | <b>0.006</b> |
| Breast invasive carcinoma                                        | 0.41  | <b>0.000</b> | 0.31  | <b>0.000</b> | 0.28  | <b>0.000</b> | 0.35  | <b>0.000</b> | -0.09 | <b>0.003</b> | 0.15  | <b>0.000</b> |
| Cervical squamous cell carcinoma and endocervical adenocarcinoma | 0.17  | <b>0.003</b> | 0.18  | <b>0.002</b> | 0.02  | 0.777        | 0.20  | <b>0.000</b> | 0.07  | 0.233        | -0.12 | <b>0.030</b> |
| Cholangiocarcinoma                                               | 0.56  | <b>0.000</b> | 0.20  | 0.247        | -0.08 | 0.642        | 0.05  | 0.786        | -0.03 | 0.844        | -0.04 | 0.836        |
| Colon adenocarcinoma                                             | 0.51  | <b>0.000</b> | 0.41  | <b>0.000</b> | 0.32  | <b>0.000</b> | 0.37  | <b>0.000</b> | -0.04 | 0.434        | 0.16  | <b>0.001</b> |
| Lymphoid Neoplasm Diffuse Large B-cell Lymphoma                  | 0.51  | <b>0.000</b> | 0.75  | <b>0.000</b> | 0.63  | <b>0.000</b> | 0.70  | <b>0.000</b> | 0.20  | 0.175        | 0.69  | <b>0.000</b> |
| Esophageal carcinoma                                             | 0.19  | <b>0.010</b> | 0.11  | 0.142        | 0.02  | 0.781        | 0.26  | <b>0.000</b> | 0.02  | 0.822        | -0.12 | 0.100        |
| Glioblastoma multiforme                                          | 0.11  | 0.168        | 0.34  | <b>0.000</b> | 0.17  | <b>0.035</b> | 0.39  | <b>0.000</b> | 0.43  | <b>0.000</b> | 0.51  | <b>0.000</b> |
| Head and Neck squamous cell carcinoma                            | 0.38  | <b>0.000</b> | 0.37  | <b>0.000</b> | 0.10  | <b>0.026</b> | 0.42  | <b>0.000</b> | 0.28  | <b>0.000</b> | 0.13  | <b>0.002</b> |
| Kidney Chromophobe                                               | 0.14  | 0.245        | 0.29  | <b>0.017</b> | -0.02 | 0.872        | 0.39  | <b>0.001</b> | 0.05  | 0.705        | 0.39  | <b>0.001</b> |
| Kidney renal clear cell carcinoma                                | 0.57  | <b>0.000</b> | 0.59  | <b>0.000</b> | 0.35  | <b>0.000</b> | 0.61  | <b>0.000</b> | 0.06  | 0.164        | 0.49  | <b>0.000</b> |
| Kidney renal papillary cell carcinoma                            | 0.51  | <b>0.000</b> | 0.41  | <b>0.000</b> | 0.25  | <b>0.000</b> | 0.52  | <b>0.000</b> | 0.26  | <b>0.000</b> | 0.46  | <b>0.000</b> |
| Brain Lower Grade Glioma                                         | 0.28  | <b>0.000</b> | 0.48  | <b>0.000</b> | 0.05  | 0.246        | 0.53  | <b>0.000</b> | -0.07 | 0.116        | 0.44  | <b>0.000</b> |
| Liver hepatocellular carcinoma                                   | 0.46  | <b>0.000</b> | 0.44  | <b>0.000</b> | 0.26  | <b>0.000</b> | 0.46  | <b>0.000</b> | 0.18  | <b>0.001</b> | 0.70  | <b>0.000</b> |
| Lung adenocarcinoma                                              | 0.31  | <b>0.000</b> | 0.19  | <b>0.000</b> | 0.24  | <b>0.000</b> | 0.29  | <b>0.000</b> | -0.14 | <b>0.002</b> | 0.00  | 0.949        |
| Lung squamous cell carcinoma                                     | 0.19  | <b>0.000</b> | 0.11  | <b>0.015</b> | -0.06 | 0.189        | 0.12  | <b>0.008</b> | 0.07  | 0.113        | 0.01  | 0.809        |
| Mesothelioma                                                     | 0.47  | <b>0.000</b> | 0.40  | <b>0.000</b> | 0.22  | <b>0.039</b> | 0.35  | <b>0.001</b> | -0.10 | 0.374        | 0.41  | <b>0.000</b> |
| Ovarian serous cystadenocarcinoma                                | 0.27  | <b>0.000</b> | 0.28  | <b>0.000</b> | 0.10  | 0.098        | 0.09  | 0.125        | -0.02 | 0.794        | 0.01  | 0.871        |
| Pancreatic adenocarcinoma                                        | 0.64  | <b>0.000</b> | 0.65  | <b>0.000</b> | 0.03  | 0.738        | 0.53  | <b>0.000</b> | -0.11 | 0.136        | 0.04  | 0.553        |
| Pheochromocytoma and Paraganglioma                               | 0.40  | <b>0.000</b> | 0.10  | 0.186        | -0.03 | 0.701        | 0.12  | 0.096        | -0.27 | <b>0.000</b> | 0.35  | <b>0.000</b> |
| Prostate adenocarcinoma                                          | 0.58  | <b>0.000</b> | 0.44  | <b>0.000</b> | 0.72  | <b>0.000</b> | 0.47  | <b>0.000</b> | -0.11 | <b>0.011</b> | 0.20  | <b>0.000</b> |
| Rectum adenocarcinoma                                            | 0.48  | <b>0.000</b> | 0.44  | <b>0.000</b> | 0.42  | <b>0.000</b> | 0.47  | <b>0.000</b> | -0.16 | <b>0.037</b> | 0.11  | 0.157        |
| Sarcoma                                                          | 0.08  | 0.193        | 0.15  | <b>0.017</b> | 0.31  | <b>0.000</b> | 0.21  | <b>0.001</b> | -0.14 | <b>0.021</b> | 0.11  | 0.077        |
| Skin Cutaneous Melanoma                                          | 0.21  | <b>0.000</b> | 0.48  | <b>0.000</b> | 0.29  | <b>0.000</b> | 0.56  | <b>0.000</b> | 0.19  | <b>0.000</b> | 0.47  | <b>0.000</b> |
| Stomach adenocarcinoma                                           | 0.36  | <b>0.000</b> | 0.28  | <b>0.000</b> | 0.11  | <b>0.026</b> | 0.40  | <b>0.000</b> | -0.04 | 0.410        | -0.12 | <b>0.013</b> |
| Testicular Germ Cell Tumors                                      | 0.59  | <b>0.000</b> | 0.35  | <b>0.000</b> | 0.53  | <b>0.000</b> | 0.35  | <b>0.000</b> | 0.53  | <b>0.000</b> | -0.16 | <b>0.050</b> |
| Thyroid carcinoma                                                | 0.38  | <b>0.000</b> | 0.10  | <b>0.025</b> | 0.15  | <b>0.001</b> | 0.31  | <b>0.000</b> | 0.03  | 0.546        | 0.08  | 0.075        |
| Thymoma                                                          | 0.55  | <b>0.000</b> | 0.48  | <b>0.000</b> | 0.61  | <b>0.000</b> | 0.45  | <b>0.000</b> | -0.43 | <b>0.000</b> | 0.32  | <b>0.000</b> |
| Uterine Corpus Endometrial Carcinoma                             | 0.38  | <b>0.000</b> | 0.17  | <b>0.000</b> | 0.21  | <b>0.000</b> | 0.29  | <b>0.000</b> | -0.05 | 0.244        | 0.09  | <b>0.040</b> |
| Uterine Carcinosarcoma                                           | 0.19  | 0.159        | 0.04  | 0.788        | 0.24  | 0.078        | 0.28  | <b>0.038</b> | -0.08 | 0.531        | 0.05  | 0.717        |
| Uveal Melanoma                                                   | 0.73  | <b>0.000</b> | 0.73  | <b>0.000</b> | 0.50  | <b>0.000</b> | 0.72  | <b>0.000</b> | 0.51  | <b>0.000</b> | 0.77  | <b>0.000</b> |

Bold values indicate  $P < 0.05$
